# Supplementary material for: Sex Differences in Mouse Cardiac Electrophysiology Revealed by Simultaneous Imaging of Excitation-Contraction Coupling
Source: MDPI journal article supplement (doi:10.3390/jcdd10120479), 2023-11-29
Supplement: s1 [file s1]

## CM isolation buffer compositions:

### EDTA Buffer:

| Compound                                            | Molar mass (g/mol) | Final concentration (mmol/l) | g/500ml required |
|-----------------------------------------------------|--------------------|------------------------------|------------------|
| NaCl                                                | 58.44              | 130                          | 3.8              |
| KCl                                                 | 74.55              | 5                            | 0.185            |
| Na <sub>2</sub> HPO <sub>4</sub> ·7H <sub>2</sub> O | 268.07             | 0.5                          | 0.076            |
| HEPES                                               | 238.3              | 10                           | 1.19             |
| Glucose (Dextrose)                                  | 180.16             | 10                           | 0.9              |
| BDM                                                 | 101.1              | 10                           | 0.5              |
| Taruiine                                            | 125.15             | 10                           | 0.625            |
| EDTA·2Na·2H <sub>2</sub> O                          | 372.24             | 5                            | 0.73             |

Adjust pH to 7.8 with NaOH sterile 0.22µm filter and store at 4° C

### Perfusion Buffer:

| Compound                                            | Molar mass (g/mol) | Final concentration (mmol/l) | g/500ml required |
|-----------------------------------------------------|--------------------|------------------------------|------------------|
| NaCl                                                | 58.44              | 130                          | 3.8              |
| KCl                                                 | 74.55              | 5                            | 0.185            |
| Na <sub>2</sub> HPO <sub>4</sub> ·7H <sub>2</sub> O | 268.07             | 0.5                          | 0.076            |
| HEPES                                               | 238.3              | 10                           | 1.19             |
| Glucose (Dextrose)                                  | 180.16             | 10                           | 0.9              |
| BDM                                                 | 101.1              | 10                           | 0.5              |
| Taruiine                                            | 125.15             | 10                           | 0.625            |
| MgCl <sub>2</sub> ·6H <sub>2</sub> O                | 203.3              | 1                            | 0.101            |

Adjust pH to 7.8 with NaOH sterile 0.22µm filter and store at 4° C

### Collagenase Buffer:

| Compound          | Final concentration | Concentration of stock |
|-------------------|---------------------|------------------------|
| Collagenase II    | 0.5 (mg/ml)         | 100x (50mg/ml)         |
| Collagenase IV    | 0.5 (mg/ml)         | 100x (50mg/ml)         |
| Protease XIV      | 0.05 (mg/ml)        | 1000x (50mg/ml)        |
| CaCl <sub>2</sub> | 50 µM               | 2000x (100mM)          |

Make collagenase buffer day of experiment

**STOP Buffer:**

| Solution         | ml for 10ml STOP buffer |
|------------------|-------------------------|
| Perfusion buffer | 9.5                     |
| FBS              | 0.5                     |

**Culture/ Imaging media:**

| Compound                   | Stock concentration | Final concentration | ml / 100ml media required |
|----------------------------|---------------------|---------------------|---------------------------|
| M199 Media (no phenol red) | /                   | /                   | 95                        |
| BSA                        | 5% (in PBS)         | 0.1%                | 2                         |
| ITS                        | 100x                | 1x                  | 1                         |
| CD lipid                   | 100x                | 1x                  | 1                         |
| Penstrep                   | 100x                | 1x                  | 1                         |

Store Culture media at 4°C

**Calcium Reintroduction Buffer:**

| Solution         | ml for Buffer I | ml for Buffer II | ml for Buffer III |
|------------------|-----------------|------------------|-------------------|
| Perfusion buffer | 15              | 10               | 5                 |
| Culture media    | 5               | 10               | 15                |

Store Calcium reintroduction buffers at 4°C

**Critical Reagents source:**

| Reagent                    | Vendor       | Cat #       |
|----------------------------|--------------|-------------|
| Collagenase type II powder | Thermofisher | 17101015    |
| Collagenase type IV powder | Thermofisher | 17104019    |
| Protease type XIV powder   | Sigma        | P5147-100MG |
| M199 media (no phenol red) | Thermofisher | 11043023    |
| ITS supplement             | Sigma        | I3146-5ML   |
| CD lipid concentrate       | Thermofisher | 11905031    |
